# Supplementary material for: Identification of Crocetin as a Dual Agonist of GPR40 and GPR120 Responsible for the Antidiabetic Effect of Saffron
Source: MDPI journal article supplement (doi:10.3390/nu15224774), 2023-11-13
Supplement: s1 [file s1]

## Supporting Information

# Identification of Crocetin as a Dual Agonist of GPR40 and GPR120 Responsible for the Antidiabetic Effect of Saffron

Xiaodi Zhao <sup>1</sup>, Dohee Ahn <sup>2</sup>, Gibeom Nam <sup>1</sup>, Jihee Kwon <sup>1</sup>, Songyi Song <sup>1</sup>, Min Ji Kang <sup>1</sup>, Hyejin Ahn <sup>1</sup> and Sang J. Chung <sup>1,2,\*</sup>

<sup>1</sup> Department of Biopharmaceutical Convergence, Sungkyunkwan University, Suwon 16419, Republic of Korea; zhaoxiaodi1019@gmail.com (X.Z.); skarlqja12@g.skku.edu (G.N.); yg1549@naver.com (J.K.); songe1997@naver.com (S.S.); minjii\_q@naver.com (M.J.K.); hyejin0930@skku.edu (H.A.)

<sup>2</sup> School of Pharmacy, Sungkyunkwan University, Suwon 16419, Republic of Korea; ehgml94@naver.com

\* Correspondence: sjchung@skku.edu; Tel.: +82-31-290-7703

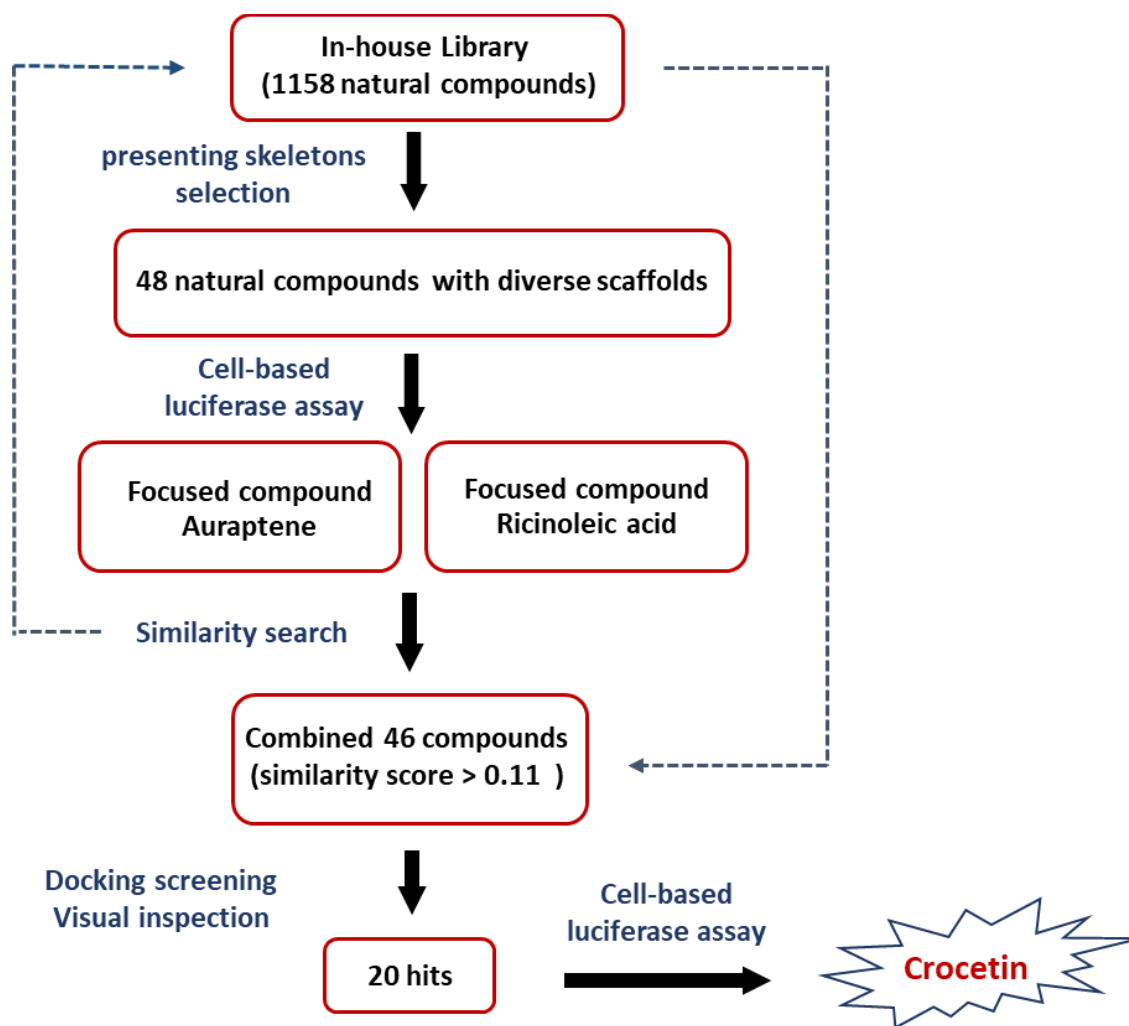

**Figure S1.** Schematic of the screening strategy and various criteria applied to select lead compounds.

**Table S1.** SRE-Luciferase reporter assay results of the 48 compounds

| Compound                        | GPR40 Emax (%) <sup>a</sup> | GPR120 Emax (%) <sup>b</sup> |
|---------------------------------|-----------------------------|------------------------------|
| 1,2,3,4,6-o-Pentagalloylglucose | 0.21 ± 0.85                 | 0.20 ± 2.84                  |
| 1,5-Dicaffeoylquinic acid       | 5.37 ± 2.91                 | 2.50 ± 0.99                  |
| Acetate gossypol                | 0.34 ± 2.12                 | 1.55 ± 1.44                  |
| Chikusetsusaponin Iva           | 7.74 ± 1.16                 | 4.03 ± 0.48                  |
| Chlorogenic acid                | 7.92 ± 4.70                 | 21.18 ± 6.92                 |
| <b>Auraptene</b>                | <b>81.36 ± 5.71</b>         | <b>40.06 ± 4.97</b>          |
| Chrysophanol                    | 1.75 ± 0.87                 | 0.43 ± 2.93                  |
| 4'-Demethylepipodophyllotoxin   | 1.58 ± 1.50                 | 23.91 ± 1.75                 |
| Corilagin                       | 2.50 ± 5.25                 | 5.27 ± 1.31                  |
| Crocin                          | 6.00 ± 2.57                 | 5.35 ± 0.90                  |
| Cyanidin chloride               | 0.20 ± 1.32                 | 8.71 ± 2.58                  |
| desmethylbellidifolin           | 2.00 ± 0.61                 | 5.47 ± 6.12                  |
| Ginsenoside Ro                  | 2.34 ± 0.17                 | 8.03 ± 2.38                  |
| Ellagic Acid                    | 0.79 ± 0.25                 | 7.19 ± 0.71                  |
| 3,4-Dicaffeoylquinic acid       | 0.77 ± 4.17                 | 7.60 ± 2.91                  |
| Gallic acid                     | 1.30 ± 0.54                 | 12.91 ± 5.76                 |
| Gambogic acid                   | NA                          | NA                           |
| <b>Ricinoleic acid</b>          | <b>79.82 ± 6.46</b>         | <b>13.54 ± 1.01</b>          |
| ligustroflavone                 | 4.77 ± 3.60                 | 0.62 ± 6.99                  |
| Gomisin D                       | 40.82 ± 8.41                | 14.92 ± 2.45                 |
| Nepetin                         | 2.80 ± 1.64                 | NA                           |
| Huperzine B                     | 12.23 ± 3.60                | 18.68 ± 7.58                 |
| Roburic Acid                    | 0.44 ± 1.99                 | 1.88 ± 0.36                  |
| Indirubin                       | 3.16 ± 1.00                 | 1.14 ± 0.61                  |
| Neogambogic acid                | 0.15 ± 0.84                 | NA                           |
| 5,7,3',4'-Tetramethoxyflavone   | 4.55 ± 1.11                 | 14.66 ± 1.69                 |
| Maslinic acid                   | 0.53 ± 4.24                 | NA                           |
| Myricetrin                      | 7.75 ± 0.72                 | 10.05 ± 4.56                 |
| Nodakenin                       | 2.13 ± 2.51                 | 7.27 ± 9.60                  |
| Punicalagin                     | 4.11 ± 0.24                 | 10.77 ± 6.88                 |
| Punicalin                       | 5.10 ± 1.90                 | 12.81 ± 8.26                 |
| Quercetin 7-rhamnoside          | 2.90 ± 3.79                 | 11.04 ± 0.62                 |
| Ranaconitine                    | 1.71 ± 3.66                 | 5.02 ± 0.24                  |
| Rhynchophylline                 | 2.03 ± 4.68                 | 9.37 ± 1.91                  |
| Sanguinarine                    | 4.28 ± 0.90                 | 4.12 ± 2.61                  |
| Scutellarein                    | 6.61 ± 1.19                 | 41.70 ± 6.78                 |
| Sodium Danshensu                | 0.76 ± 0.92                 | 6.12 ± 0.23                  |
| Theaflavin                      | 1.00 ± 0.54                 | 23.43 ± 2.26                 |
| Theaflavin-3'-gallate           | 9.82 ± 1.97                 | 13.39 ± 0.91                 |
| Theobromine                     | 2.23 ± 3.19                 | 6.37 ± 1.00                  |
| Tangeretin                      | 5.45 ± 1.79                 | 8.19 ± 6.24                  |
| Tormentic acid                  | 0.450.41                    | NA                           |
| Wedelolactone                   | 3.04 ± 2.37                 | 3.61 ± 1.49                  |

<sup>a</sup>, <sup>b</sup> SRE-Luciferase reporter assay. <sup>a</sup> Percent activity of test compounds at 20 μM compared to 10 μM AMG1638. <sup>b</sup> Percent activity of test compounds at 20 μM compared to 10 μM GSK13764. GPR40, G-protein-coupled receptor 40; GPR120, G-protein-coupled receptor 120; SRE, serum response element and DMSO, dimethyl sulfoxide. NA: no activity

**Table S2.** SRE-Luciferase reporter assay results of the 22 hit compounds

| Compound             | Structure                                                                           | GPR40 Emax (%) <sup>a</sup> | GPR120 Emax (%) <sup>b</sup> |
|----------------------|-------------------------------------------------------------------------------------|-----------------------------|------------------------------|
| Ricinoleic acid      | 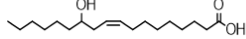   | 79.82±6.46                  | 13.54±1.01                   |
| Auraptene            |    | 81.36±5.71                  | 40.06±4.97                   |
| 10-Gingerol          |    | 9.86±1.68                   | 0.43±1.49                    |
| 8-Gingerol           |    | 25.31±0.87                  | 3.80±0.37                    |
| Crocin               |    | 101.56±5.74                 | 114.63±5.25                  |
| Curcumin             |    | 31.62±1.25                  | 20.49±2.43                   |
| Fucoxanthin          |    | 27.39±0.37                  | 4.79±0.89                    |
| Ginkgolic Acid C13:0 |    | 10.48±1.73                  | 22.77±7.59                   |
| Ginkgolic Acid C15:1 |    | 28.78±1.85                  | 7.20±4.66                    |
| Ginkgolic Acid C17:1 |  | 9.523±3.12                  | 1.64±0.14                    |
| Lutein               |  | 38.51±2.37                  | 22.63±0.15                   |
| Zeaxanthin           |  | 40.16±0.40                  | 27.92±5.80                   |
| Astaxanthin          |  | 20.48±9.19                  | 1.88±2.81                    |
| Phloretic acid       |  | 29.36±1.34                  | 19.82±1.42                   |
| Macamide Impurity 2  |  | 34.30±4.88                  | 10.75±1.20                   |
| Macamide Impurity 3  |  | 19.03±4.66                  | 6.25±1.69                    |
| Macamide Impurity 10 |  | 32.28±0.94                  | 39.76±1.44                   |
| Octyl gallate        |  | 28.35±0.59                  | 0.42±0.71                    |
| Nervonic Acid        |  | 8.68±4.98                   | 1.51±3.09                    |
| Acitretin            |  | 29.35±3.00                  | 0.46±3.58                    |
| Erucic acid          |  | 24.31±4.9                   | 21.34±1.64                   |
| Isobavachalcone      |  | 17.95±7.23                  | 35.15±0.75                   |

<sup>a</sup>, <sup>b</sup> SRE-Luciferase reporter assay. <sup>a</sup> Percent activity of test compounds at 20 μM compared to 10 μM AMG1638. <sup>b</sup> Percent activity of test compounds at 20 μM compared to 10 μM GSK13764. GPR40, G-protein-coupled receptor 40; GPR120, G-protein-coupled receptor 120; SRE, serum response element and DMSO, dimethyl sulfoxide.

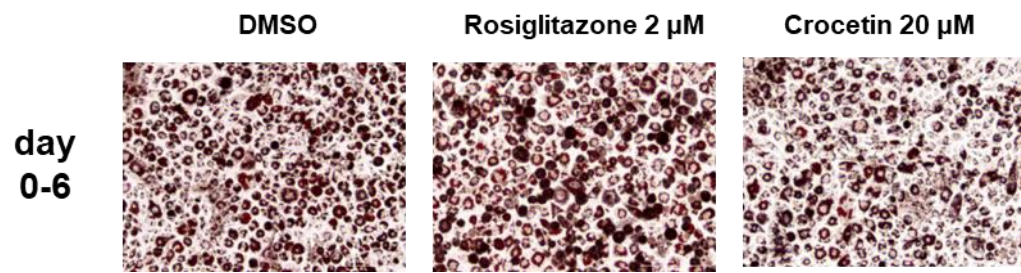

**Figure S2.** Lipid accumulation effect of crocetin. At the early stage of differentiation, preadipocytes of 3T3-L1 cells were differentiated by DMI-induction (DMI: dexamethasone, methylisobutylxanthine, and insulin) and treated with 20  $\mu$ M crocetin or 2  $\mu$ M positive control rosiglitazone simultaneously.
